# Supplementary material
Source: PubMed Central journal article supplement (PMC7486905)
Supplement: NIHMS1626257-supplement-supporting_information.pdf [file NIHMS1626257-supplement-supporting_information.pdf]

**Supporting information for: “Origin of internal friction in disordered proteins depends on solvent quality”**

*Wenwei Zheng, Hagen Hofmann, Benjamin Schuler and Robert B. Best*

**Supplementary Figures.**

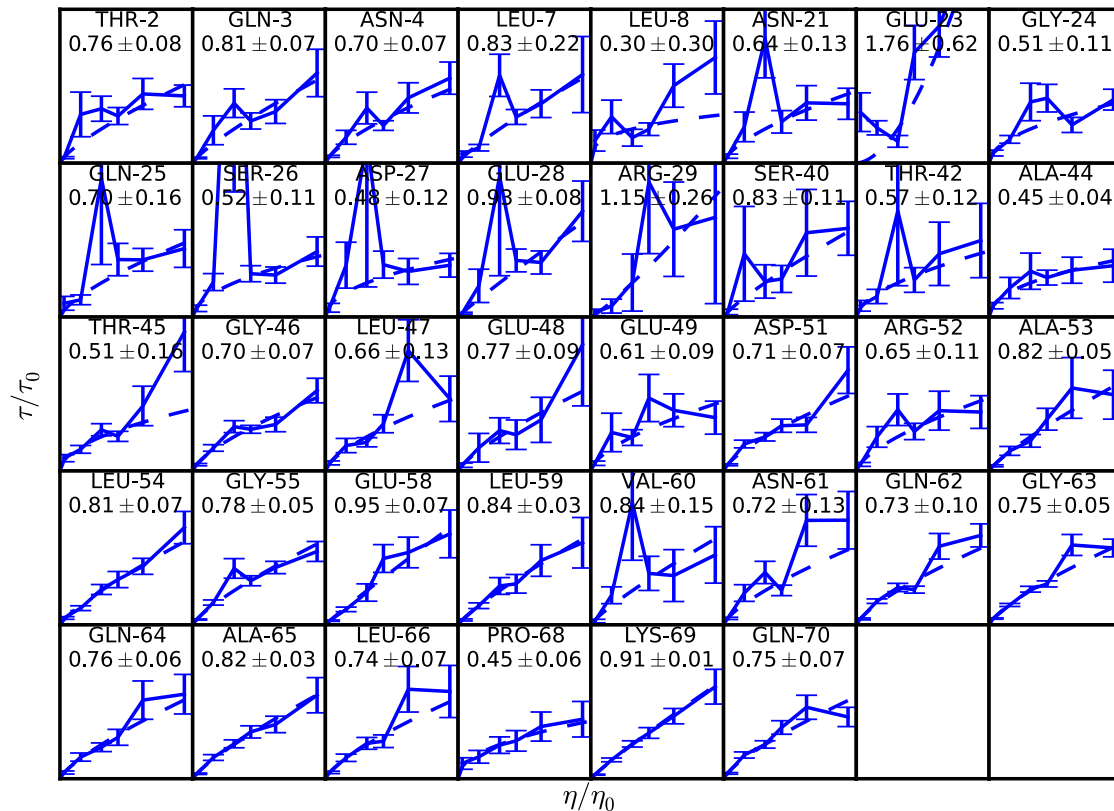

**Figure S1. Internal friction on dihedral relaxation of ACTR.** The title in each panel shows the residue index, name and the power-law fitting exponent  $\beta$ . Only the residues with more than 5 dihedral flipping events in the simulation are shown.

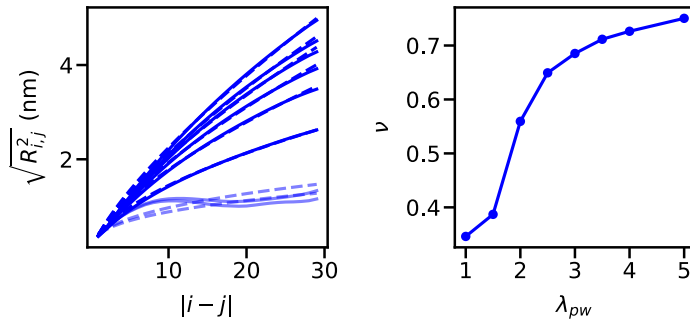

**Figure S2. The length scaling exponent from fitting distances as a function of the sequence separation  $\sqrt{R^2_{i,j}} = bN^\nu$ .** We determined both the prefactor  $b$  and the scaling exponent  $\nu$  by globally fitting all the data with  $\lambda_{pw} \geq 2.0$ . We obtain the prefactor  $b = 0.40$  nm for the coarse-grained homo-polypeptide model, which is expected to be different from the prefactor of a typical disordered protein ( $\sim 0.55$  nm)<sup>1</sup>.

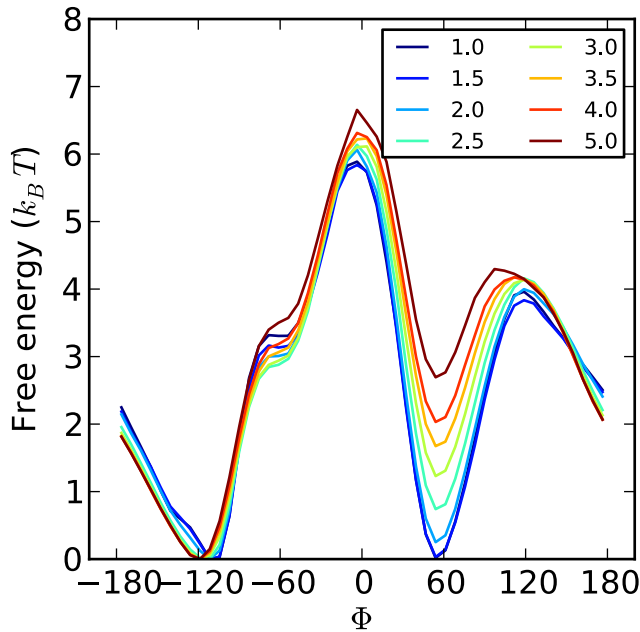

**Figure S3. Free energy as a function of the dihedral angles in the coarse-grained simulations.** The legend shows the scaling factor  $\lambda_{pw}$  of the pair interactions between the peptide and water.

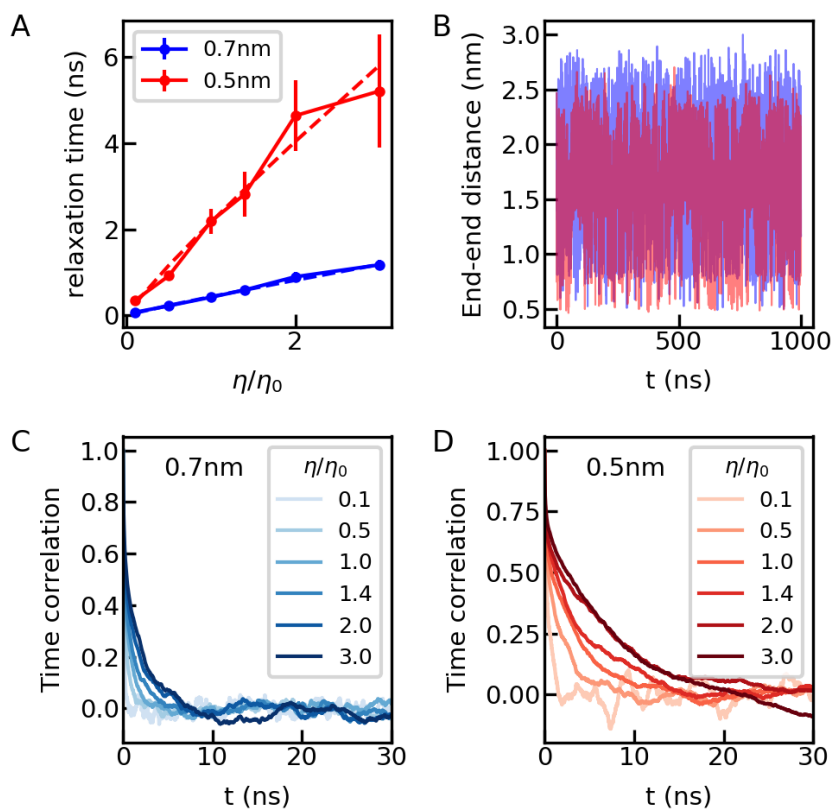

**Figure S4. Relaxation time and time correlation function of end-end distance for the  $R_g$ -restrained simulations.** A) The relaxation time of end-end distance for the  $R_g$ -restraint simulation with different targeted  $R_g$ . Legend shows the targeted  $R_g$ . B) Time series of end-end distances from the simulation trajectory of normal solvent viscosity, with color code the same as A). C and D) Time correlation function of end-end distance with different targeted  $R_g$ . Legend shows the solvent viscosity.

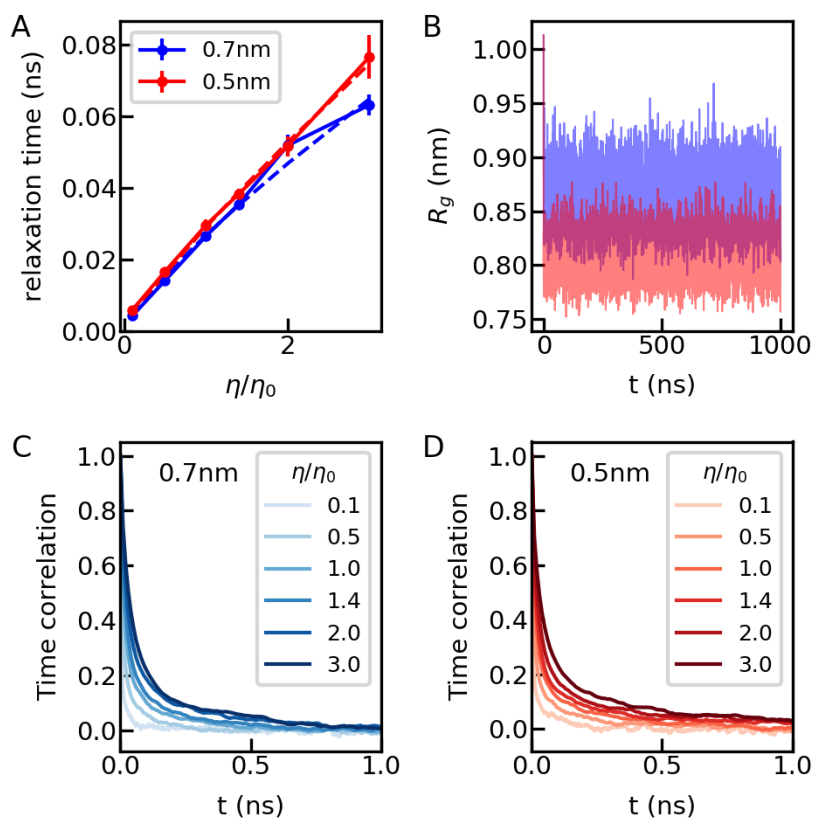

**Figure S5. Relaxation time and time correlation function of  $R_g$  for the  $R_g$ -restrained simulations.** A) The relaxation time of  $R_g$  for the  $R_g$ -restrained simulation with different targeted  $R_g$ . Legend shows the targeted  $R_g$ . B) Time series of  $R_g$  from the simulation trajectory of normal solvent viscosity, with color code as in A). C and D) Time correlation function of  $R_g$  with different targeted  $R_g$ . Legend shows the solvent viscosity.

## Supplementary Tables.

**Table S1.** The scaling of water mass, the relative viscosity to water and the corresponding time step used in molecular dynamics simulations. The mass and viscosity of normal water are referred to by  $m_0$  and  $\eta_0$ , respectively.

| $m/m_0$ | $\eta/\eta_0$ | Time step (fs) |
|---------|---------------|----------------|
| 0.01    | 0.1           | 0.2            |
| 0.25    | 0.5           | 1              |
| 1       | 1             | 2              |
| 2       | 1.4           | 2              |
| 4       | 2             | 2              |
| 9       | 3             | 2              |

**Table S2.**  $R_g$  of ACTR. Estimates of radius of gyration of ACTR from simulation (present work) and several experimental sources. In brackets after the  $R_g$  value, we give the method used to analyze the experimental data, with “Guinier”, Guinier analysis<sup>2</sup>, “Ensemble”, ensemble fitting<sup>3</sup>, SAW- $\nu$ , self-avoiding walking with adjustable scaling exponent<sup>4</sup>, and “Extended”, extended Guinier analysis with empirical fourth-order scattering vector term<sup>5</sup>. \* indicates cases with small variations of chain length; the  $R_g$  values for these cases have been rescaled to a chain length of 71 using the corresponding scaling exponent by  $R_{g,scaled} = R_g \cdot \left(\frac{71-1}{N-1}\right)^\nu$ .

| Source            | Method                             | Temperature (K) | Number of residues | $R_g$ (nm)                                                  |
|-------------------|------------------------------------|-----------------|--------------------|-------------------------------------------------------------|
| Current           | Simulation (Fig. 1F)               | 295             | 71                 | $2.23 \pm 0.10$                                             |
| Ref. <sup>6</sup> | SAXS                               | 278             | 71                 | 2.63 (Guinier)                                              |
|                   |                                    | 318             | 71                 | 2.39 (Guinier)                                              |
| Ref. <sup>3</sup> | FRET                               | 298             | 75*                | $2.33 \pm 0.08$ (Ensemble)<br>$2.36 \pm 0.06$ (SAW- $\nu$ ) |
|                   | SAXS (0.58M Urea)<br>(0.32M GdmCl) | 298             | 79*                | $2.34 \pm 0.04$ (Extended)<br>$2.35 \pm 0.03$ (Extended)    |
|                   | Simulation                         | 298             | 79*                | $2.22 \pm 0.21$                                             |
| Ref. <sup>7</sup> | FRET                               | 295             | 75*                | $2.47 \pm 0.06$ (SAW- $\nu$ )                               |

**Table S3.** Internal friction of ACTR.

| Method                       | $\beta$     | $\alpha = \tau_0/\tau[\eta_0]$ | $\tau_0$ (ns) |
|------------------------------|-------------|--------------------------------|---------------|
| Experiment                   | 0.75 (0.02) | 0.39 (0.05)                    | 64 (9)        |
| Simulation                   | 0.64 (0.13) | 0.18 (0.16)                    | 32 (8)        |
| Compact, dihedral restraint  | 0.41 (0.29) | 0.56 (0.45)                    | 7.4 (1.6)     |
| Extended, dihedral restraint | 1.04 (0.17) | -0.07 (0.15)                   | 5.2 (2.0)     |

**Table S4.** Internal friction from the end-end distance relaxation time of the coarse-grained simulations.

| $\lambda_{pw}$ | $\beta$     | $\alpha = \tau_0/\tau[\eta_0]$ | $\tau_0$ (ns) |
|----------------|-------------|--------------------------------|---------------|
| 1.0            | 0.52 (0.09) | 0.53 (0.17)                    | 2.10 (0.67)   |
| 1.5            | 0.71 (0.17) | 0.32 (0.16)                    | 0.48 (0.02)   |
| 2.0            | 0.75 (0.13) | 0.27 (0.21)                    | 0.38 (0.03)   |
| 2.5            | 0.95 (0.03) | 0.07 (0.03)                    | 0.25 (0.03)   |
| 3.0            | 0.92 (0.03) | 0.04 (0.02)                    | 0.30 (0.02)   |
| 3.5            | 1.03 (0.05) | 0.003 (0.057)                  | 0.38 (0.02)   |
| 4.0            | 1.00 (0.03) | 0.009 (0.035)                  | 0.44 (0.03)   |
| 5.0            | 0.96 (0.01) | 0.03 (0.02)                    | 0.45 (0.02)   |

**Table S5.** Internal friction when increasing dihedral barriers in the coarse-grained simulations.

| Added barrier (k <sub>B</sub> T) | $\beta$     | $\alpha = \tau_0/\tau[\eta_0]$ | $\tau_0$ (ns) |
|----------------------------------|-------------|--------------------------------|---------------|
| 0                                | 0.92 (0.03) | 0.04 (0.02)                    | 0.30 (0.02)   |
| 2                                | 1.09 (0.07) | -0.01 (0.10)                   | 0.35 (0.02)   |
| 4                                | 0.90 (0.03) | 0.09 (0.05)                    | 0.44 (0.05)   |
| 6                                | 0.53 (0.09) | 0.51 (0.19)                    | 0.76 (0.10)   |

**Table S6.** Internal friction when introducing harmonic constraint on the dihedral angles ( $\beta_{freeze}$ ) or introducing potential energy function to compensate dihedral barriers ( $\beta_{remove}$ ) in the polypeptide simulation.  $\lambda_{pw}=1.5$  corresponds to a compact state whereas  $\lambda=2.0$  an expanded state.

| $\lambda$ | $\beta_{original}$ | $\beta_{freeze}$ | $\beta_{remove}$ |
|-----------|--------------------|------------------|------------------|
| 1.5       | 0.71 (0.17)        | 0.88 (0.04)      | 0.58 (0.06)      |
| 2.0       | 0.75 (0.13)        | 0.98 (0.02)      | 0.98 (0.08)      |

**Table S7.** Internal friction when introducing harmonic constraint on the  $R_g$  in the polypeptide simulation.  $\lambda_{pw}=5.0$  for these simulations.

| $R_{g-original}$ | Targeted $R_g$ (nm) | $R_{g-restraint}$ (nm) | $\beta_{original}$ | $\beta_{restraint}$ | $\tau_{0,restraint}$ (ns) |
|------------------|---------------------|------------------------|--------------------|---------------------|---------------------------|
| 1.70             | 0.50                | 0.81                   | 0.96 (0.01)        | 0.90 (0.11)         | 0.42 (0.02)               |
| 1.70             | 0.70                | 0.86                   | 0.96 (0.01)        | 0.92 (0.04)         | 2.18 (0.29)               |

## References.

1. Hofmann, H.; Soranno, A.; Borgia, A.; Gast, K.; Nettels, D.; Schuler, B., Polymer scaling laws of unfolded and intrinsically disordered proteins quantified with single-molecule spectroscopy. *Proc Natl Acad Sci USA* **2012**, *109* (40), 16155-16160.
2. Guinier, A., La diffraction des rayons x aux tres petits angles: applications a l'etude de phenomenes ultramicroscopiques. *Ann. Phys.* **1939**, *12*, 161-237.
3. Borgia, A.; Zheng, W.; Buholzer, K.; Borgia, M. B.; Schuler, A.; Hofmann, H.; Soranno, A.; Nettels, D.; Gast, K.; Grishaev, A.; Best, R. B.; Schuler, B., Consistent View of Polypeptide Chain Expansion in Chemical Denaturants from Multiple Experimental Methods. *J Am Chem Soc* **2016**, *138* (36), 11714-26.
4. Zheng, W.; Zerze, G. H.; Borgia, A.; Mittal, J.; Schuler, B.; Best, R. B., Inferring properties of disordered chains from FRET transfer efficiencies. *J Chem Phys* **2018**, *148* (12).
5. Zheng, W.; Best, R. B., An Extended Guinier Analysis for Intrinsically Disordered Proteins. *J Mol Biol* **2018**, *430* (16), 2540-2553.
6. Kjaergaard, M.; Nørholm, A.-B.; Hendus-Altenburger, R.; Pedersen, S. F.; Poulsen, F. M.; Kragelund, B. B., Temperature-dependent structural changes in intrinsically disordered proteins: formation of alpha-helices or loss of polyproline II? *Protein Sci* **2010**, *19* (8), 1555-1564.
7. Soranno, A.; Zosel, F.; Hofmann, H., Internal friction in an intrinsically disordered protein: comparing Rouse-like models with experiments. *J. Chem. Phys* **2018**, *148*, 123326.
